# Supplementary material for: Phase transitions in hydrophobe/phospholipid mixtures: hints at connections between pheromones and anaesthetic activity
Source: Royal Society of Chemistry journal article supplement (doi:10.1039/c6cp00659k), 2016-01-01
Supplement: c6cp00659k1.pdf [file c6cp00659k1.pdf]

## Electronic Supplementary Information

### Phase Transitions in Hydrophobe/Phospholipid Mixtures: Hints at Connections between Pheromone and Anaesthetic Action

Silvia Borsacchi,<sup>a</sup> Marco Geppi,<sup>b</sup> Sara Macchi,<sup>b</sup> Barry W. Ninham,<sup>c</sup> Emiliano Fratini,<sup>d</sup> Moira Ambrosi,<sup>d</sup> Piero Baglioni,<sup>e</sup> and Pierandrea Lo Nostro<sup>\*d,e</sup>

<sup>a</sup>: Istituto di Chimica del Composti OrganoMetallici (ICCOM) del CNR, 56124 Pisa, Italy.

<sup>b</sup>: Department of Chemistry and Industrial Chemistry, University of Pisa, 56124 Pisa, Italy.

<sup>c</sup>: Department of Applied Mathematics, The Australian National University, Canberra ACT0200, Australia.

<sup>d</sup>: Department of Chemistry & CSGI, University of Florence, 50019 Sesto Fiorentino (Firenze), Italy.

<sup>e</sup>: Enzo Ferroni Foundation, 50019 Sesto Fiorentino (Firenze), Italy.

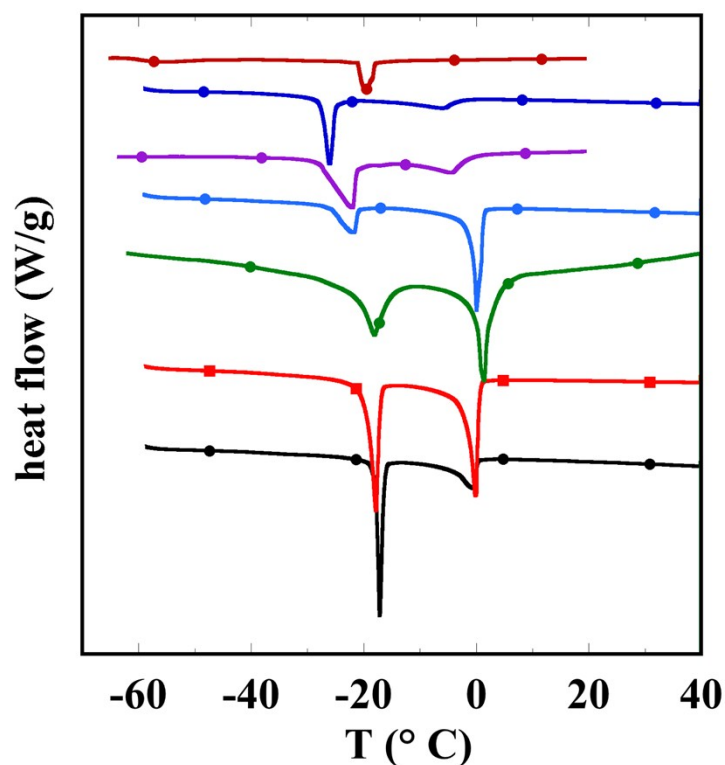

**Figure S1.** DSC runs for the different DOPC/pheromone samples as a function of the pheromone/DOPC mole ratio (c): 0 (●), 0.1 (●), 0.2 (●), 0.7 (●), 0.9 (●), 1.8 (●), 7.3 (●). Curves have been offset for graphical purposes.
